# Supplementary material for: Adsorption of Macrolide Antibiotics and a Metabolite onto Polyethylene Terephthalate and Polyethylene Microplastics in Aquatic Environments
Source: MDPI journal article supplement (doi:10.3390/antibiotics13050408), 2024-04-29
Supplement: s1 [file s1]

## **Supplementary material**

# **Adsorption of Macrolide Antibiotics and a Metabolite onto Polyethylene Terephthalate and Polyethylene Microplastics in Aquatic Environments**

**Carmen Mejías, Julia Martín \*, Laura Martín-Pozo, Juan Luis Santos, Irene Aparicio and Esteban Alonso**

Departamento de Química Analítica, Escuela Politécnica Superior, Universidad de Sevilla, E-41011 Seville, Spain; cmpadilla@us.es (C.M.); lpozo@us.es (L.M.-P.); jlsantos@us.es (J.L.S.); iaparicio@us.es (I.A.); ealonso@us.es (E.A.)

\* Correspondence: jbueno@us.es; Tel.: +34-954-556-250

**Table S1.** Surface area and particle size of PE and PET particles before and after adsorption process.

|                                                        | PE particles<br>300 $\mu\text{m}$ before<br>adsorption | PE particles<br>300 $\mu\text{m}$ after<br>adsorption | PET particles<br>300 $\mu\text{m}$ before<br>adsorption | PET particles<br>300 $\mu\text{m}$ after<br>adsorption |
|--------------------------------------------------------|--------------------------------------------------------|-------------------------------------------------------|---------------------------------------------------------|--------------------------------------------------------|
| BET surface area<br>( $\text{m}^2/\text{g}$ )          | 0.0686                                                 | 0.0726                                                | 0.1345                                                  | 0.1444                                                 |
| Single point<br>surface area ( $\text{m}^2/\text{g}$ ) | 0.0555                                                 | 0.0601                                                | 0.1137                                                  | 0.1213                                                 |
| Particle size ( $\mu\text{m}$ )                        | 252.630                                                | 242.985                                               | 118.847                                                 | 125.620                                                |

**Table S2.** Adsorption kinetic parameters.

| Compound   | PFO model      |                          |                | PSO model      |                |                          |
|------------|----------------|--------------------------|----------------|----------------|----------------|--------------------------|
|            | R <sup>2</sup> | q <sub>e</sub><br>(mg/g) | k <sub>1</sub> | R <sup>2</sup> | k <sub>2</sub> | q <sub>e</sub><br>(mg/g) |
| <b>PE</b>  |                |                          |                |                |                |                          |
| CLM        | 0.661          | 0.001                    | 0.001          | 0.968          | 0.004          | 0.001                    |
| DM-CLM     | 0.760          | 0.002                    | 0.002          | 0.979          | 0.005          | 0.002                    |
| ERY        | 0.868          | 0.001                    | 0.001          | 0.983          | 0.004          | 0.001                    |
| RXM        | 0.756          | 0.001                    | 0.001          | 0.987          | 0.004          | 0.001                    |
| AZM        | 0.662          | 0.001                    | 0.001          | 0.976          | 0.004          | 0.001                    |
| <b>PET</b> |                |                          |                |                |                |                          |
| CLM        | 0.663          | 0.004                    | 0.002          | 0.969          | 0.006          | 0.004                    |
| DM-CLM     | 0.667          | 0.005                    | 0.003          | 0.977          | 0.008          | 0.005                    |
| ERY        | 0.576          | 0.004                    | 0.002          | 0.973          | 0.006          | 0.004                    |
| RXM        | 0.764          | 0.004                    | 0.002          | 0.977          | 0.006          | 0.004                    |
| AZM        | 0.865          | 0.004                    | 0.002          | 0.984          | 0.007          | 0.004                    |

**Table S3.** Physical-chemical properties of the target compounds.

| Compound                                          | Molecular weight (g mol <sup>-1</sup> ) | p <i>K</i> <sub>a</sub>                   | Log <i>K</i> <sub>ow</sub> | Structure                                                                             |
|---------------------------------------------------|-----------------------------------------|-------------------------------------------|----------------------------|---------------------------------------------------------------------------------------|
| <b>Roxithromycin (RXM)</b>                        | 837.0                                   | 9.08 <sup>a</sup> ,<br>12.45 <sup>a</sup> | 2.75 <sup>c</sup>          | 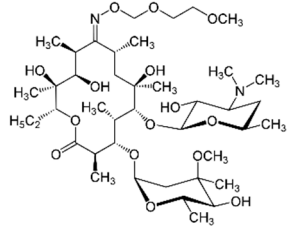   |
| <b>Azithromycin (AZM)</b>                         | 749.0                                   | 9.57 <sup>a</sup> ,<br>12.43 <sup>a</sup> | 4.02 <sup>c</sup>          |    |
| <b>Erythromycin (ERY)</b>                         | 733.9                                   | 8.38 <sup>a</sup> ,<br>12.44 <sup>a</sup> | 3.06 <sup>c</sup>          |   |
| <b>Clarithromycin (CLM)</b>                       | 747.9                                   | 8.38 <sup>a</sup> ,<br>12.46 <sup>a</sup> | 3.16 <sup>c</sup>          |  |
| <i>N</i> -<br>desmethylclarithromycin<br>(DM-CLM) | 733.9                                   | 13.08 <sup>b</sup>                        | -                          |  |

Parent compounds are marked in bold; Abbreviations are written in brackets; -: Not data found. <sup>a</sup>: <https://go.drugbank.com/>; <sup>b</sup>: <https://www.chemicalbook.com/>; <sup>c</sup>: Li et al., 2018.

**Table S4.** Water sources characterisation.

| <b>Water sources</b>   | <b>pH</b> | <b>Cl<sup>-</sup> (M)</b> | <b>P<sub>T</sub><br/>(mg/L)</b> | <b>COD<br/>(mg/L)</b> | <b>N<sub>T</sub><br/>(mg/L)</b> | <b>σ (mS/cm)</b> |
|------------------------|-----------|---------------------------|---------------------------------|-----------------------|---------------------------------|------------------|
| Tap water              | 6.59      | 8.2 E-4                   | <0.1                            | 22.3                  | <20                             | 0.44             |
| Surface water          | 8.15      | 2.8 E-4                   | <0.17                           | 31.0                  | <20                             | 2.07             |
| Effluent<br>wastewater | 8.99      | 2.5 E-3                   | 0.42                            | 32.0                  | 21.1                            | 0.94             |
| Influent<br>wastewater | 9.20      | 2.5 E-3                   | 2.98                            | 171                   | 35.9                            | 1.11             |

COD: Chemical oxygen demand.

**Table S5.** Matrix correlation of macrolides and metabolite adsorption onto PE MPs with water sources physical-chemical characteristics.

| Variable                             | pH          | Cl <sup>-</sup><br>(M) | PO <sub>4</sub> <sup>3-</sup><br>(mg/L) | COD<br>(mg/L) | N <sub>T</sub><br>(mg/L) | σ<br>(mS/cm) | AZM<br>Ads (%) | CLM<br>Ads (%) | DM-CLM<br>Ads (%) | ERY<br>Ads (%) | RXM<br>Ads (%) |
|--------------------------------------|-------------|------------------------|-----------------------------------------|---------------|--------------------------|--------------|----------------|----------------|-------------------|----------------|----------------|
| pH                                   | <b>1.00</b> | <b>0.99</b>            | <b>0.62</b>                             | 0.59          | 0.59                     | 0.37         | <b>-0.95</b>   | <b>-0.97</b>   | <b>-0.97</b>      | <b>-0.89</b>   | 0.17           |
| Cl <sup>-</sup> (M)                  |             | <b>1.00</b>            | <b>0.60</b>                             | 0.57          | 0.57                     | 0.24         | <b>-0.98</b>   | <b>-0.98</b>   | <b>-0.98</b>      | <b>-0.90</b>   | 0.03           |
| PO <sub>4</sub> <sup>3-</sup> (mg/L) |             |                        | <b>1.00</b>                             | <b>1.00</b>   | <b>1.00</b>              | -0.03        | <b>-0.69</b>   | <b>-0.76</b>   | <b>-0.75</b>      | <b>-0.89</b>   | -0.16          |
| COD (mg/L)                           |             |                        |                                         | <b>1.00</b>   | <b>1.00</b>              | 0.02         | <b>-0.65</b>   | <b>-0.73</b>   | <b>-0.73</b>      | <b>-0.86</b>   | -0.10          |
| N <sub>T</sub> (mg/L)                |             |                        |                                         |               | <b>1.00</b>              | -0.04        | <b>-0.66</b>   | <b>-0.73</b>   | <b>-0.73</b>      | <b>-0.87</b>   | -0.17          |
| σ (mS/cm)                            |             |                        |                                         |               |                          | <b>1.00</b>  | -0.06          | -0.20          | -0.20             | -0.07          | <b>0.98</b>    |
| AZM Ads (%)                          |             |                        |                                         |               |                          |              | <b>1.00</b>    | <b>0.98</b>    | <b>0.98</b>       | <b>0.94</b>    | 0.15           |
| CLM Ads (%)                          |             |                        |                                         |               |                          |              |                | <b>1.00</b>    | <b>1.00</b>       | <b>0.97</b>    | 0.01           |
| DM-CLM Ads (%)                       |             |                        |                                         |               |                          |              |                |                | <b>1.00</b>       | <b>0.97</b>    | 0.00           |
| ERY Ads (%)                          |             |                        |                                         |               |                          |              |                |                |                   | <b>1.00</b>    | 0.12           |
| RXM Ads (%)                          |             |                        |                                         |               |                          |              |                |                |                   |                | <b>1.00</b>    |

Ads: adsorption; COD: Chemical oxygen demand.

**Table S6.** Matrix correlation of macrolides and metabolite adsorption onto PET MPs with water sources physical-chemical characteristics.

| Variable                             | pH          | Cl <sup>-</sup><br>(M) | PO <sub>4</sub> <sup>3-</sup><br>(mg/L) | COD<br>(mg/L) | N <sub>T</sub><br>(mg/L) | σ<br>(mS/cm) | AZM<br>Ads (%) | CLM<br>Ads (%) | DM-CLM<br>Ads (%) | ERY<br>Ads (%) | RXM<br>Ads (%) |
|--------------------------------------|-------------|------------------------|-----------------------------------------|---------------|--------------------------|--------------|----------------|----------------|-------------------|----------------|----------------|
| pH                                   | <b>1.00</b> | <b>0.99</b>            | <b>0.62</b>                             | 0.59          | 0.59                     | 0.37         | <b>-0.92</b>   | <b>-0.98</b>   | <b>-0.98</b>      | <b>-0.97</b>   | <b>-0.97</b>   |
| Cl <sup>-</sup> (M)                  |             | <b>1.00</b>            | <b>0.60</b>                             | 0.57          | 0.57                     | 0.24         | <b>-0.96</b>   | <b>-0.95</b>   | <b>-0.94</b>      | <b>-0.96</b>   | <b>-0.94</b>   |
| PO <sub>4</sub> <sup>3-</sup> (mg/L) |             |                        | <b>1.00</b>                             | <b>1.00</b>   | <b>1.00</b>              | -0.03        | <b>-0.75</b>   | <b>-0.65</b>   | -0.52             | <b>-0.78</b>   | <b>-0.75</b>   |
| COD (mg/L)                           |             |                        |                                         | <b>1.00</b>   | <b>1.00</b>              | 0.02         | <b>-0.71</b>   | <b>-0.64</b>   | -0.51             | <b>-0.76</b>   | <b>-0.74</b>   |
| N <sub>T</sub> (mg/L)                |             |                        |                                         |               | <b>1.00</b>              | -0.04        | <b>-0.72</b>   | <b>-0.62</b>   | -0.49             | <b>-0.76</b>   | <b>-0.72</b>   |
| σ (mS/cm)                            |             |                        |                                         |               |                          | <b>1.00</b>  | 0.00           | -0.50          | -0.55             | -0.29          | -0.41          |
| AZM Ads (%)                          |             |                        |                                         |               |                          |              | <b>1.00</b>    | <b>0.87</b>    | <b>0.82</b>       | <b>0.95</b>    | <b>0.90</b>    |
| CLM Ads (%)                          |             |                        |                                         |               |                          |              |                | <b>1.00</b>    | <b>0.99</b>       | <b>0.97</b>    | <b>0.99</b>    |
| DM-CLM Ads (%)                       |             |                        |                                         |               |                          |              |                |                | <b>1.00</b>       | <b>0.93</b>    | <b>0.95</b>    |
| ERY Ads (%)                          |             |                        |                                         |               |                          |              |                |                |                   | <b>1.00</b>    | <b>0.99</b>    |
| RXM Ads (%)                          |             |                        |                                         |               |                          |              |                |                |                   |                | <b>1.00</b>    |

Ads: adsorption; COD: Chemical oxygen demand.

### LC-MS/MS determination

Chromatographic determination was performed using an Agilent 1290 Infinity II liquid chromatographic system (Agilent, USA) coupled to a 6495-triple quadrupole (QqQ) mass spectrometer (MS) equipped with an electrospray ionization source (ESI).

Chromatographic separation was carried out in a Zorbax RRHD Eclipse Plus C18 (150 mm × 3.0 mm i.d., 1.8 µm particle size) column (Agilent, Santa Clara, CA, USA), protected with a Zorbax RRHD Eclipse Plus C18 (3.0 mm i.d., 1.8 µm particle size) guard column (Agilent, Santa Clara, CA, USA) and thermostated at 35 °C. The mobile phase was composed by 10 mM ammonium formate buffer containing 0.05% of formic acid (solvent A) and methanol (solvent B). Elution was carried out at a flow rate of 0.4 mL min<sup>-1</sup>. Elution started with 5% of solvent B, held 1 min. Solvent B was linearly increased to 30% in 3 min, then to 60% in 8 min and, finally, to 100% in 2 min, held for 2 min. Back to initial conditions was carried out in 2 min and held for 2 min for equilibration. Total run time was 20 min. LC-MS/MS parameters of each compound is presented in Table S7.

The LC system was coupled to a 6410 triple quadrupole mass spectrometer (MS/MS) equipped with an electrospray ionisation source operated in positive mode. The following settings were used: fragmentor, 166 V; capillary voltage, 3000 V; nebuliser pressure, 40 psi; drying gas flow rate, 9 L min<sup>-1</sup> and gas temperature, 350 °C.

**Table S7.** LC-MS/MS parameters.

| MS/MS parameters |                 |                              |                                         |             |          |           |            |            |
|------------------|-----------------|------------------------------|-----------------------------------------|-------------|----------|-----------|------------|------------|
| Compound         | Ionization mode | Precursor ion ( <i>m/z</i> ) | Product ions (MRM1/MRM2) ( <i>m/z</i> ) | CE (V)      | RT (min) | Ion ratio | LOD (ng/L) | LOQ (ng/L) |
| CLM              | Positive        | 749.0                        | 158.1/590.4                             | 28/16       | 18.128   | 49.5      | 0.01       | 0.03       |
| DM-CLM           | Positive        | 734.9                        | 144.1/576.4                             | 144.1/576.4 | 18.161   | 23.5      | 0.02       | 0.06       |
| ERY              | Positive        | 734.5                        | 83.0/576.4                              | 83.0/576.4  | 18.140   | 81.4      | 0.02       | 0.06       |
| RXM              | Positive        | 838.1                        | 158.1/679.4                             | 32/20       | 18.214   | 72.9      | 0.01       | 0.03       |
| AZM              | Positive        | 750.0                        | 591.5/116.1                             | 28/44       | 18.138   | 56.1      | 0.01       | 0.03       |

CE: collision energy; RT: retention time; LOD: limit of detection; LOQ: limit of quantification



### Data analysis

The amount of adsorbed macrolide ( $q$ ) was calculated as the difference between its concentration before and after the adsorption experiment according to Eq. (S1):

$$(S1) \quad q = (C_i - C_e) \times V/m$$

where  $m$  is the MPs weight (g),  $V$  (L) is the solution volume,  $C_i$  (mg/L) and  $C_e$  (mg/L) are the concentrations of the macrolides at the beginning and at the end of the adsorption, respectively. Eq. (S2) was used to calculate adsorption percentage (%):

$$(S2) \quad \text{Adsorption (\%)} = (C_i - C_e)/C_i \times 100$$

Different mathematical models including Langmuir, Freundlich and Linear were evaluated to determine the adsorbent performance to experimental isotherms. Pseudo-first and pseudo-second order kinetic models were evaluated. Supplementary material, Table S8, shows a summary, including equations and parameter definition.

**Table S8.** Adsorption isotherms and kinetic models studied.

| Isotherm                 | Model Equation                                                                                                                                                                                                                                                                                                                                                                                             |
|--------------------------|------------------------------------------------------------------------------------------------------------------------------------------------------------------------------------------------------------------------------------------------------------------------------------------------------------------------------------------------------------------------------------------------------------|
| Langmuir                 | $q = \frac{q_{max} K_L C_e}{1 + (C_e K_L)}$ <p><math>C_e</math>: Equilibrium concentration of pollutants (mg/L);<br/> <math>q</math>: Equilibrium adsorption capacity (mg/g);<br/> <math>q_{max}</math>: maximum amount adsorbed within a monolayer (mg/g);<br/> <math>K_L</math>: Langmuir dissociation constant (L/mg), which is related to the adsorption energy.</p>                                   |
| Freundlich               | $q = K_F C_e^{1/n}$ <p><math>C_e</math>: Equilibrium concentration of pollutants (mg/L);<br/> <math>q</math>: Equilibrium adsorption capacity (mg/g);<br/> <math>K_F</math>: Freundlich constant (L/mg), which is related to the affinity of the adsorbent to the adsorbate;<br/> <math>1/n</math>: dimensionless parameter, which indicates how adsorption varies as a function of the concentration.</p> |
| Linear                   | $q = K_d \times C_e$ <p><math>C_e</math>: Equilibrium concentration of pollutants (mg/L);<br/> <math>q</math>: Equilibrium adsorption capacity (mg/g);<br/> <math>K_d</math>: solution-soil distribution coefficient (L/g).</p>                                                                                                                                                                            |
| Kinetic                  | Model equation                                                                                                                                                                                                                                                                                                                                                                                             |
| Pseudo-first order (PFO) | $\ln (q_e - q_t) = \ln q_e - k_1 \times t$                                                                                                                                                                                                                                                                                                                                                                 |

---

$q_e$  and  $q_t$ : amounts of compounds (mg/g) adsorbed at equilibrium and at a  $t$  time;

$t$ : time (min);

$k_1$ : PFO kinetic constants.

---

Pseudo-second order (PSO)

$$t/q_t = 1/(k_2 \times q_e^2) + t/q_e$$

$q_e$  and  $q_t$ : amounts of compounds (mg/g) adsorbed at equilibrium and at a  $t$  time;

$t$ : time (min);

$k_2$ : PSO kinetic constants.

---

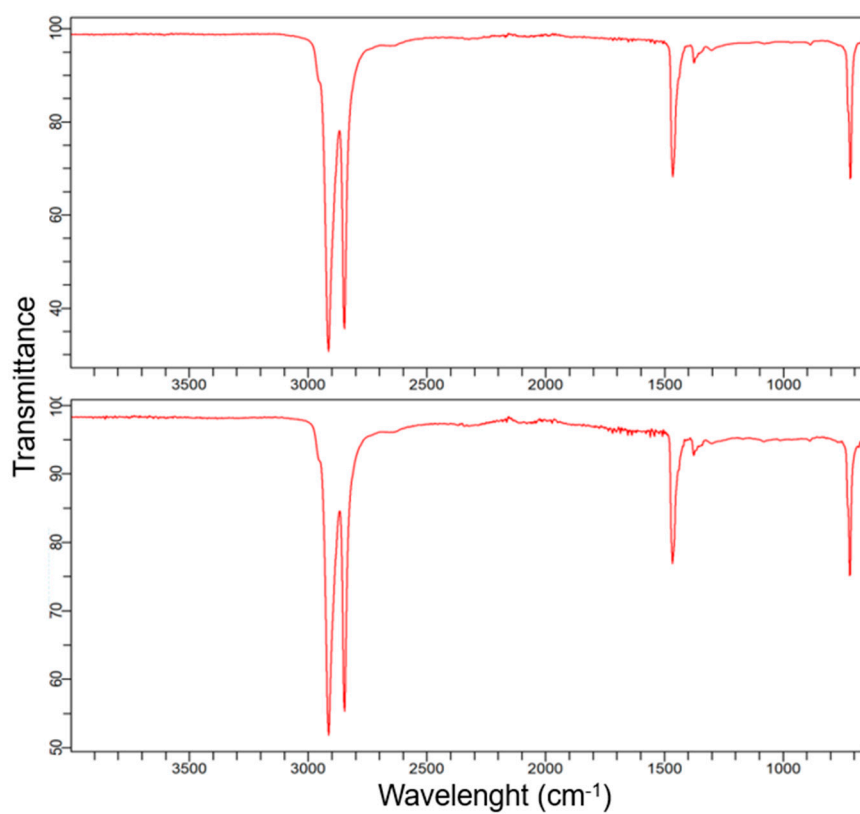

**Figure S1.** FTIR analysis of PE before (upper) and after (down) the adsorption process.

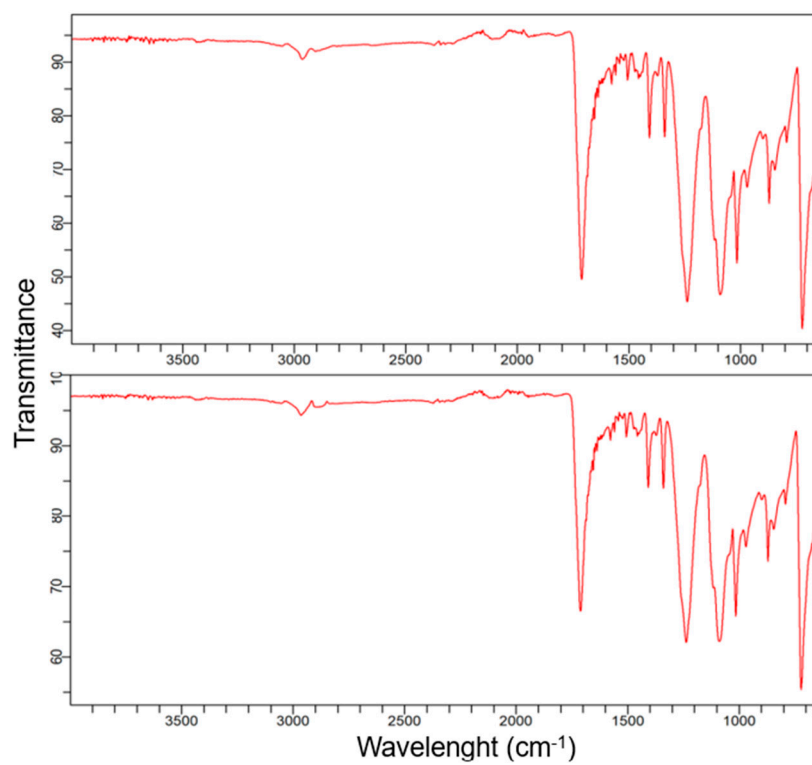

**Figure S2.** FTIR analysis of PET before (upper) and after (down) the adsorption process.

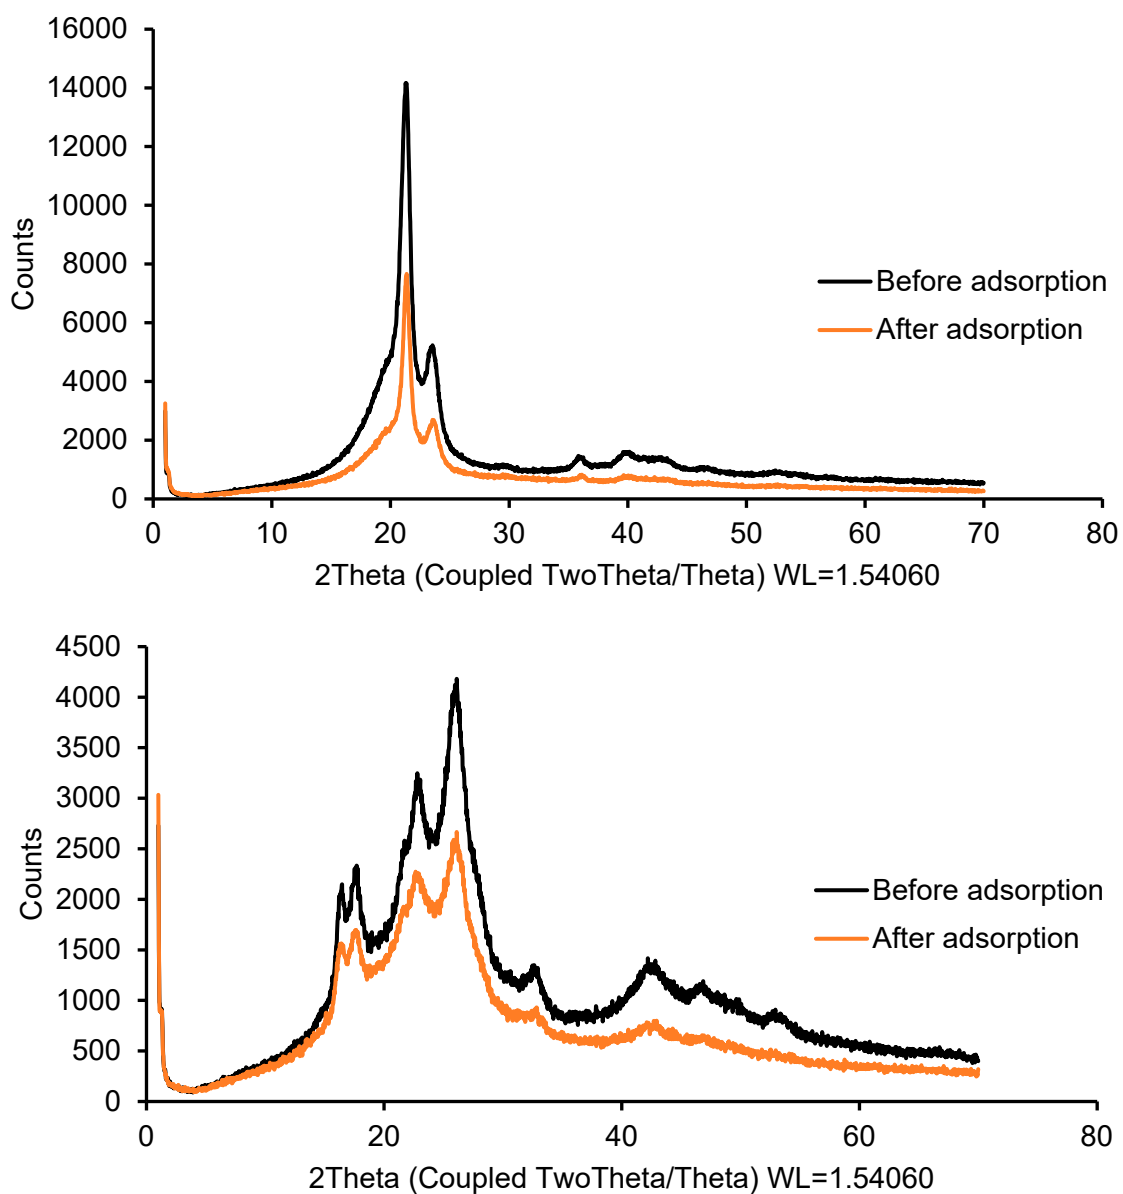

**Figure S3.** XRD analysis for PE before and after the adsorption process (upper) and for PET before and after the adsorption process (down).

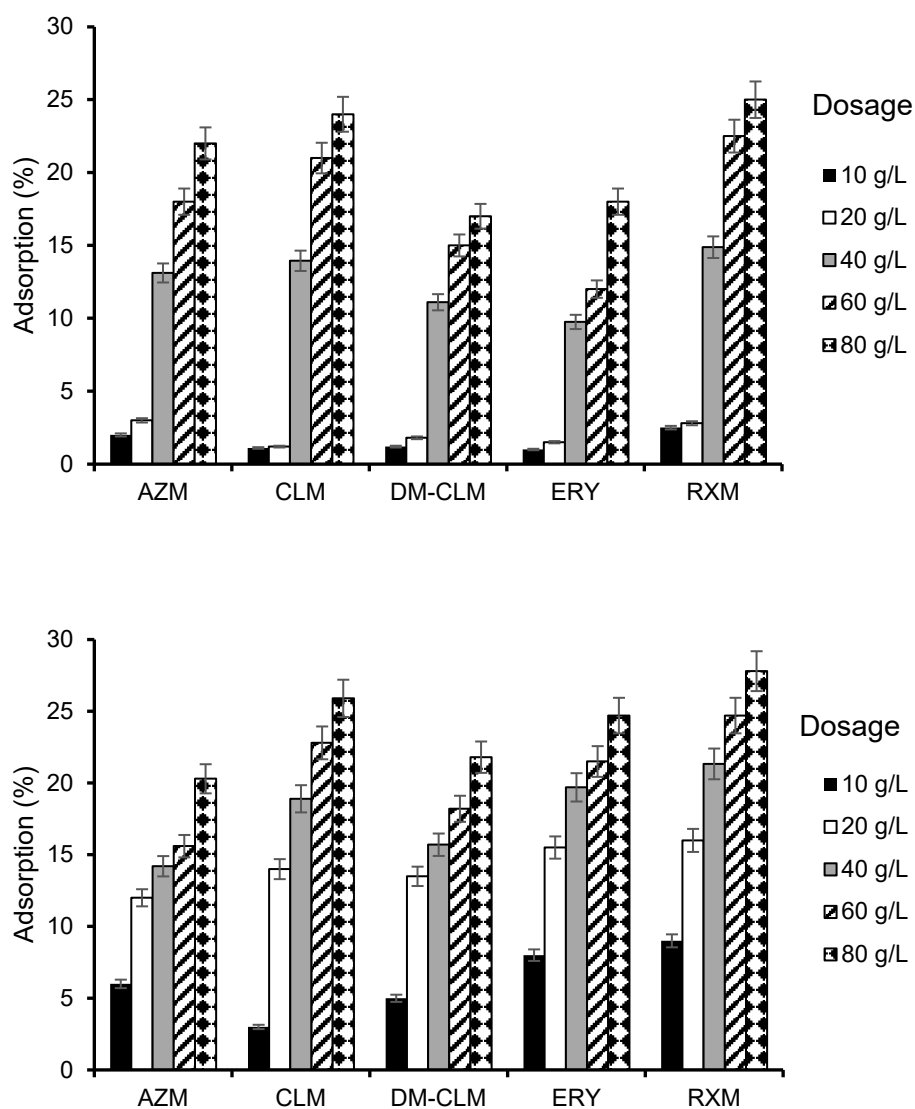

**Figure S4.** Adsorption percentage (%) of macrolides and metabolite on PE (upper) and PET (down) MPs in the evaluation of microplastic dosage.

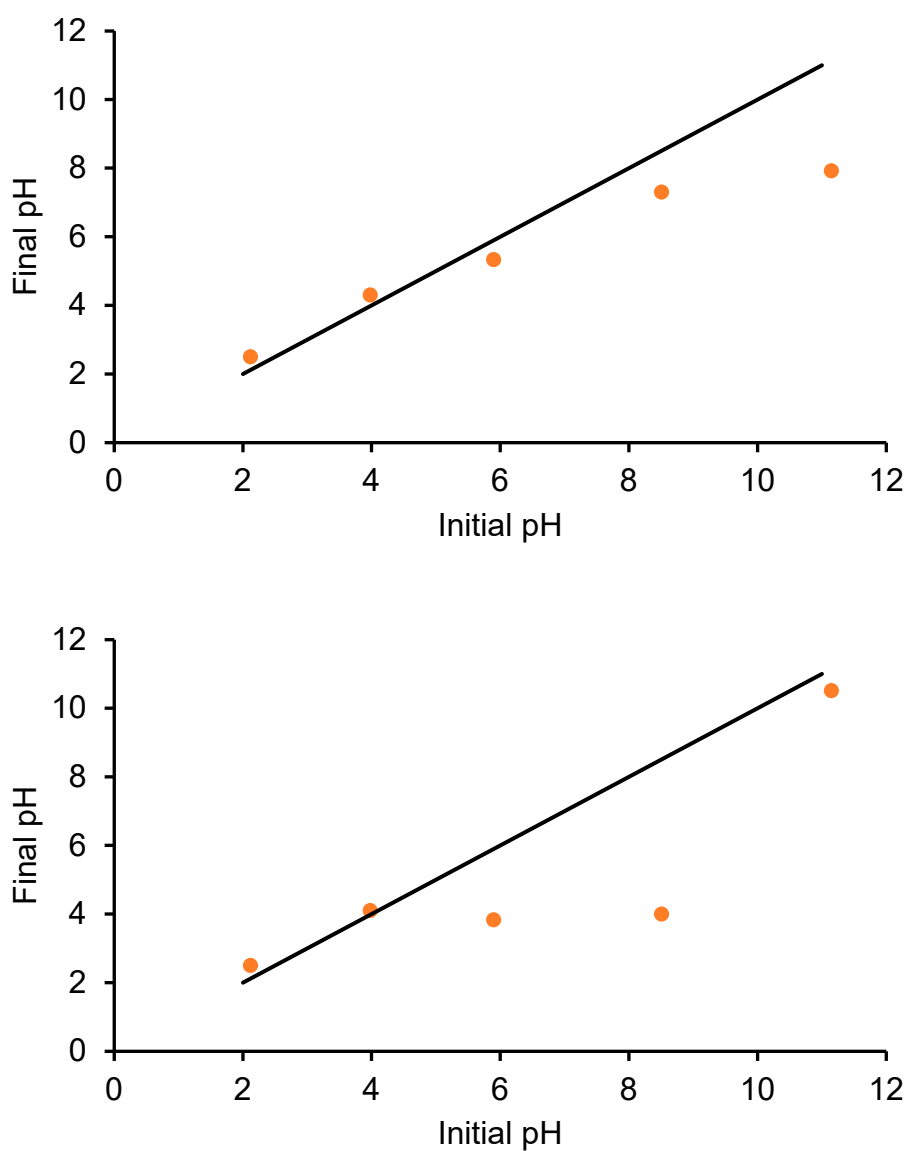

**Figure S5.** Final pH with PE after 48h of agitation versus initial pH without PE (upper) and final pH with PET after 48h of agitation versus initial pH without PET (down).

#### Supplementary material references

Chemical Book. Sourcing and Integrating Center of Chemicals Materials in China. Available on: <https://www.chemicalbook.com/>

DrugBank Online. Database for Drug and Drug Target Info. Available on: <https://go.drugbank.com/>
